# Supplementary material for: The Impact of Improved Aerosol Priors on Near-Infrared Measurements of Carbon Dioxide
Source: Copernicus journal article supplement (doi:10.5194/amt-2018-366), 2018-11-21
Supplement: Supplementary file [file amt-2018-366-AC2-supplement.pdf]

The authors would like to thank Referee #2 for their comments on our manuscript entitled, "The Impact of Improved Aerosol Priors on Near-Infrared Measurements of Carbon Dioxide." Below, we have addressed their comments and made the necessary changes in the manuscript.

**p.3, l.6 "Often, a constant... aerosol setup": please give some literature references.**

We have added Parker et al. (2011) and O'Dell et al. (2012) as references.

**p.5, l.8 "The co-location... Fig. 2." 1 degree latitude/longitude seems to be quite coarse and this may possibly lead to differences between ground- and satellite observation that are related to spatial representativeness. Did you test a smaller region (e.g. 0.5x0.5 degree) and does this influence one of your findings? (e.g. the relatively poor correlation between AERONET AOD and OCO-2 retrieved AOD, see Fig. 3).**

Because CO<sub>2</sub> and aerosols tend to vary slowly in space, this large co-location criteria has been shown to give similar errors to using smaller regions (e.g. 0.5 x 0.5 degrees.) However, because of OCO-2's narrow path the number of co-located measurements is greatly reduced as the distance thresholds are lowered.

**Also on Fig. 3: how can the high correlation (0.74) between the AERONET AOD and the GEOS-5 AOD be understood? Does GEOS-5 rely on assimilated AOD from satellites? If so, then perhaps it is worth to mention this in the paper.**

Yes, GEOS-5 ingests MODIS and MISR aerosol data. We mention this on p.7 l. 5.

**p. 5, l.16 "We co-located... Basu et al., 2013): 9 global carbon models are mentioned, but only 8 references are given. Please check if one is missing.**

We have added the final citation (Schuh et al., 2019). Technically it is still in review, but will likely be fully published in the next few weeks.

**p.5, l.31 "These filters... (from IDP)": please specify the threshold values used for the three filters.**

The filter threshold values have been added.

**p.6, l.1 "Thus, all... are present.": please specify the threshold used for a thin/thick aerosol layer (e.g. below what AOD a scene is considered 'clear sky?')**

An exact threshold does not exist, because we generally do not know the true AOD for each OCO-2 measurement. However, in our TCCON validation section we are also

co-located with AERONET and thus can show that our filtering techniques remove any OCO-2 measurement with a co-located AERONET AOD of greater than 0.25. We have added this information to the paper.

**p.13, l.24 “So long as... other regions”: it is not clear from this sentence if the authors here refer to “large aerosols” (in size) or “large amounts of aerosols”?**

We have modified the text to indicate that we are referring to large amounts of aerosols.
